# Supplementary material for: Patients with cystic echinococcosis in the three national referral centers of Mongolia: A model for CE management assessment
Source: PubMed Central journal article supplement (PMC6168150; doi:10.1371/journal.pntd.0006686), 2018-08-09
Supplement: pntd.0006686.s001.pdf [file pntd.0006686.s001.pdf]

## S1 Appendix

**Fig A. CE management provided at the three levels of health care in Mongolia**

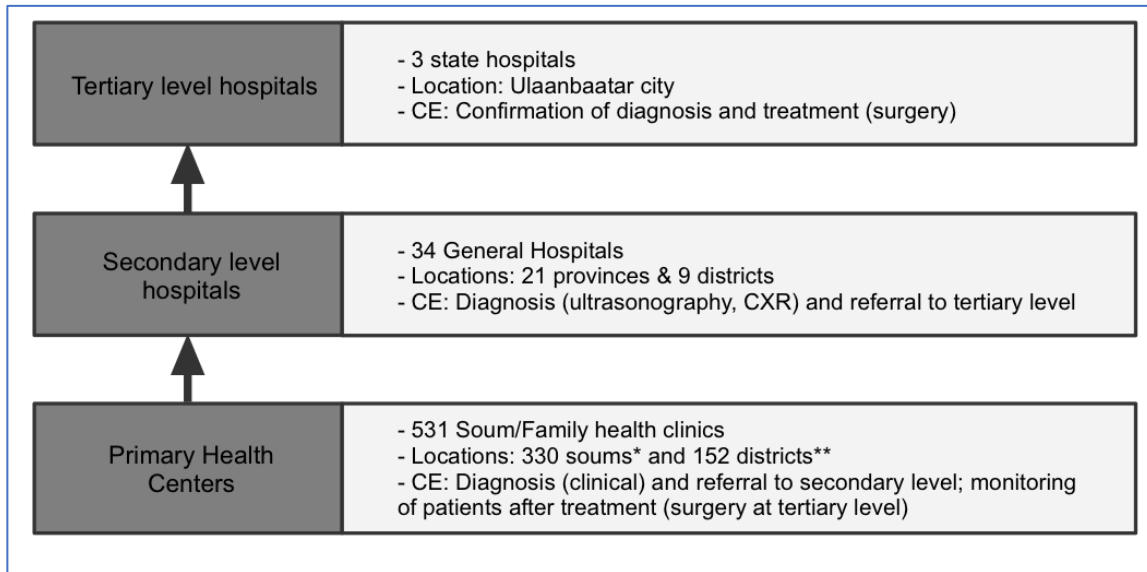

\*- smaller administrative unit of province

\*\* - smaller administrative unit of district

**Fig B. CE surgical cases per year, 2008-2015**

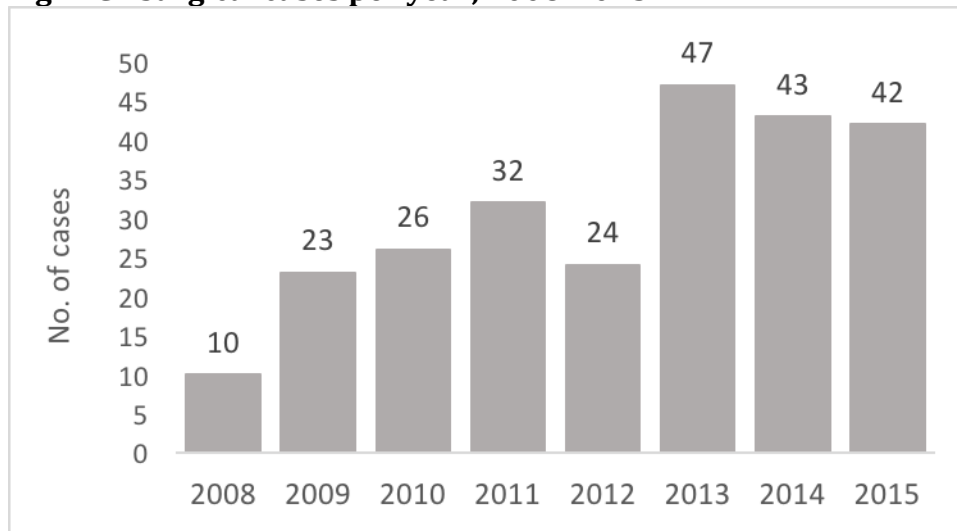

**Fig C. Clinical symptoms and signs at admission to the three state hospitals**

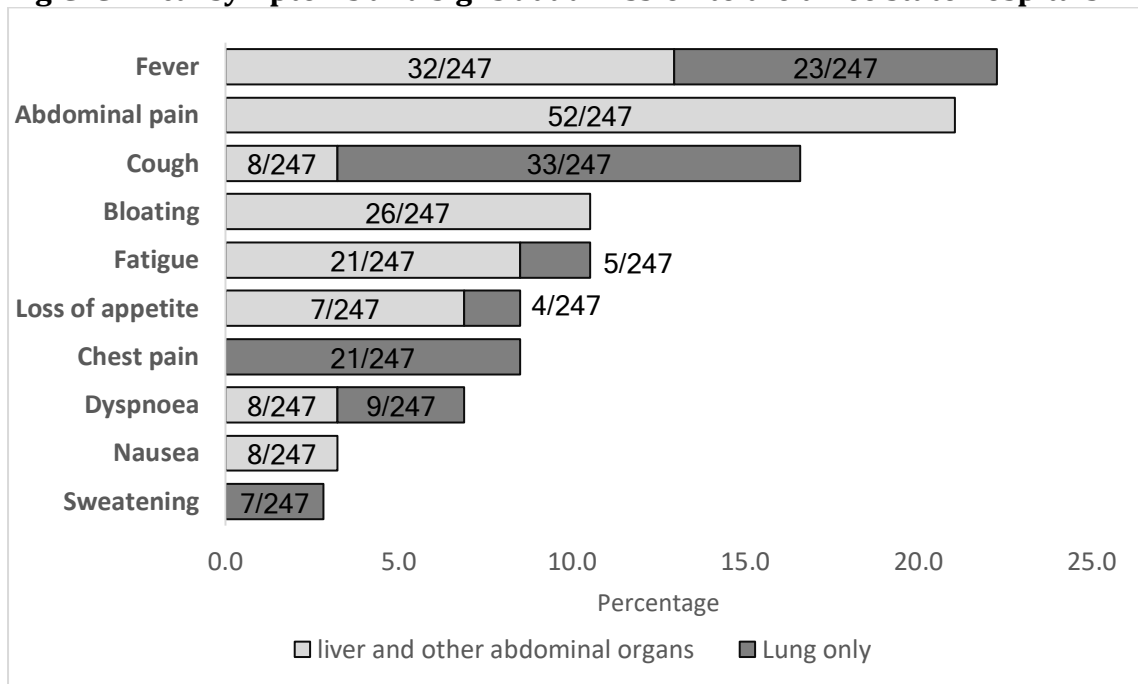

Numbers in bars represent  $N_{reported}/N_{total}$ .

**Fig D. Locations of CE cysts of the surgically treated patients at the three state hospitals between 2008 and 2015**

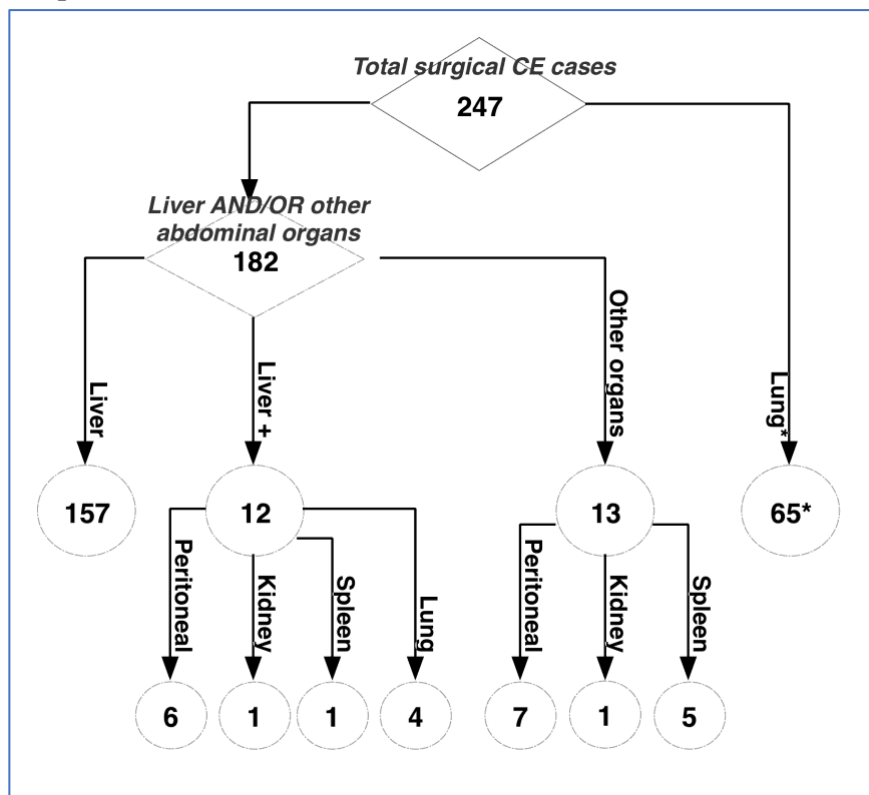

\*Not analyzed for CE cyst stages (WHO CE cyst classification) due to unavailability of the X-ray films or other appropriate imaging
